1 **FtsW is a peptidoglycan polymerase that is activated by its cognate penicillin-binding**  
2 **protein**

3

4 **Authors:** Atsushi Taguchi<sup>1</sup>, Michael A. Welsh<sup>1</sup>, Lindsey S. Marmont<sup>1</sup>, Wonsik Lee<sup>1</sup>, Daniel  
5 Kahne<sup>2</sup>, Thomas G. Bernhardt<sup>1\*</sup> and Suzanne Walker<sup>1,2\*</sup>

6

7 **Affiliations:** <sup>1</sup> Department of Microbiology and Immunobiology, Harvard Medical School,  
8 Boston, MA 02115, USA

9 <sup>2</sup> Department of Chemistry and Chemical Biology, Harvard University, Cambridge, MA 02138,  
10 USA

11 \* email: [thomas\\_bernhardt@hms.harvard.edu](mailto:thomas_bernhardt@hms.harvard.edu); [suzanne\\_walker@hms.harvard.edu](mailto:suzanne_walker@hms.harvard.edu)

12 **ABSTRACT**

13           **The peptidoglycan cell wall is essential for the survival and shape maintenance of**  
14 **bacteria.<sup>1</sup> For decades it was thought that only penicillin-binding proteins (PBPs)**  
15 **effected peptidoglycan synthesis. Recently, it was shown that RodA, a member of the**  
16 **Rod complex involved in side wall peptidoglycan synthesis, acts as a peptidoglycan**  
17 **polymerase.<sup>2-4</sup> RodA is absent or dispensable in many bacteria that contain a cell wall;**  
18 **however, all of these bacteria have a RodA homologue, FtsW, which is a core member of**  
19 **the divisome complex that is essential for septal cell wall assembly.<sup>5,6</sup> FtsW was**  
20 **previously proposed flip the peptidoglycan precursor Lipid II to the periplasm,<sup>7,8</sup> but we**  
21 **report here that FtsW polymerizes Lipid II. We show that FtsW polymerase activity**  
22 **depends on the presence of the class B PBP (bPBP) that it recruits to the septum. We**  
23 **also demonstrate that the polymerase activity of FtsW is required for its function *in vivo*.**  
24 **Our findings establish FtsW as a peptidoglycan polymerase that works with its cognate**  
25 **bPBP to produce septal peptidoglycan during cell division.**

26

27 **MAIN TEXT**

28           Peptidoglycan is synthesized from the cell wall precursor Lipid II. This lipid-linked  
29 molecule is made inside the cell and then translocated by Lipid II flippases to the extracellular  
30 surface of the membrane where it is polymerized and crosslinked (Fig. 1a).<sup>5</sup> The penicillin-  
31 binding proteins (PBPs), a major class of enzymes involved in peptidoglycan synthesis, were  
32 identified because they are targets of  $\beta$ -lactam antibiotics such as penicillin, which covalently  
33 inactivate their crosslinking domains. The PBPs comprise several types of enzymes, of which  
34 the most important for peptidoglycan synthesis are the class A PBPs (aPBPs) and the class B  
35 PBPs (bPBPs).<sup>9</sup> The aPBPs contain a peptidoglycan glycosyltransferase (PGT) domain that  
36 polymerizes Lipid II and a transpeptidase (TP) domain that crosslinks the resulting glycan  
37 strands (Fig. 1a). The bPBPs consist of a TP domain and a domain of unknown function. Some

38 bacteria also contain monofunctional glycosyltransferases (MGTs) that have homology to the  
39 PGT domains of the aPBPs, and these proteins can also polymerize Lipid II. It is assumed that  
40 the glycan strands produced by MGTs are crosslinked by PBPs.

41 The  $\beta$ -lactam antibiotics are the most clinically and commercially successful class of  
42 antibiotics in history. These drugs continue to be widely used for treating infections, but the  
43 emergence of  $\beta$ -lactam resistance in major human pathogens makes the identification of new  
44 antibacterial targets a high priority. Proteins that are essential in all bacteria, such as those  
45 belonging to the SEDS (shape, elongation, division, and sporulation) family, are particularly  
46 appealing therapeutic targets. Phylogenetic analysis has shown that the SEDS proteins RodA  
47 and FtsW are more widely conserved than the aPBPs.<sup>2</sup> RodA is essential in rod-shaped  
48 organisms where it serves as a key component of the Rod complex (elongasome) that makes  
49 side wall peptidoglycan.<sup>9</sup> FtsW, on the other hand, is required for the function of the division  
50 machinery (divisome) and is essential in most bacteria regardless of their shape.<sup>9</sup>

51 SEDS proteins have been found to form subcomplexes with bPBPs.<sup>10,11</sup> Therefore, the  
52 recent discovery that RodA has peptidoglycan polymerase activity has led to the proposal that  
53 SEDS-bPBP complexes form two-component peptidoglycan synthases with polymerase and  
54 crosslinking activities on separate polypeptides (Fig. 1b).<sup>2-4</sup> Accordingly, mutations predicted to  
55 disrupt RodA interactions with its cognate bPBP (PBP2) cause the Rod system to malfunction *in*  
56 *vivo*.<sup>12</sup> However, polymerase activity has thus far only been demonstrated for RodA from  
57 *Bacillus subtilis*.<sup>2</sup> Whether other SEDS proteins like FtsW also function as peptidoglycan  
58 polymerases remains unclear as does the effect of association with bPBPs on this activity. We  
59 therefore expressed and purified FtsW alone or in complex with its cognate bPBP from several  
60 organisms to investigate their ability to function as peptidoglycan synthases.

61 We first expressed and purified FtsW orthologs from the Gram-positive bacteria  
62 *Streptococcus thermophilus* (StFtsW) and *Staphylococcus aureus* (SaFtsW) (Supplementary

63 Fig. 1), but failed to detect polymerase activity (Fig. 1c) when the proteins were incubated with  
64 their native Lipid II substrate (Fig. 1d and Supplementary Fig. 2). Strikingly, addition of the  
65 cognate bPBP to the FtsW reactions resulted in the production of peptidoglycan oligomers  
66 consistent with the stimulation of peptidoglycan polymerase activity (Fig. 1d and Supplementary  
67 Fig. 2). This activity was abolished when an invariant aspartate in or near the presumed active  
68 site in FtsW was mutated to alanine, but not when the TP active site of the bPBP was  
69 inactivated (Fig. 1d and Supplementary Fig. 2). Furthermore, like RodA, the activity of the  
70 *St*FtsW in the presence of its cognate bPBP (*St*PBP2x) was insensitive to the phosphoglycolipid  
71 antibiotic moenomycin that inhibits aPBPs and MGTs (Supplementary Fig. 3).<sup>2</sup> Another  
72 distinction between the activity of FtsW and that of aPBPs and MGTs is a divalent cation  
73 requirement for FtsW polymerase activity. When EDTA was added to the buffer, *St*FtsW  
74 polymerase activity was abolished, but adding excess Mg<sup>2+</sup>, Ca<sup>2+</sup>, or Mn<sup>2+</sup> to the EDTA-  
75 containing buffer restored polymerization (Fig. 1e and Supplementary Fig. 4). We therefore  
76 conclude that FtsW is a peptidoglycan polymerase that requires divalent cations and the  
77 presence of a bPBP for activity.

78         Studies in *E. coli* have demonstrated that the transmembrane (TM) domain of PBP3 is  
79 sufficient for its septal localization, and evolutionary coupling analyses have suggested that the  
80 TM domain of bPBPs interact with SEDS proteins.<sup>12–15</sup> To test whether the TM domain of a  
81 cognate bPBP is required for the PGT activity of FtsW, we removed the TM domain from  
82 *St*PBP2x and tested the ability of the  $\Delta$ TM variant to activate *St*FtsW. No peptidoglycan product  
83 was detected, showing that the TM helix is crucial for promoting FtsW polymerase activity (Fig.  
84 1d). To assess the specificity of the polymerase promoting activity, *St*FtsW and *Sa*FtsW  
85 reactions were performed in the presence of divisome bPBPs from three different species (Fig.  
86 1f and Supplementary Fig. 5). *Sa*FtsW was only able to polymerize Lipid II when combined with  
87 its native bPBP, PBP1 (*Sa*PBP1), but *St*FtsW was able to polymerize Lipid II when combined  
88 either with its cognate bPBP, *St*PBP2x, or with the divisome bPBP from *S. pneumoniae*

89 (*SpPBP2x*), which is 50% identical to its *S. thermophilus* counterpart. *StFtsW* showed no activity  
90 in the presence of *SaPBP1*. Therefore, FtsW polymerase activity requires its specific cognate or  
91 near-cognate bPBP, and the TM helix of the bPBP likely forms part of the protein-protein  
92 interface between the PGT and TP enzymes.

93 To determine if FtsW forms a stable peptidoglycan synthase complex with its cognate  
94 bPBP in both Gram-positive and Gram-negative bacteria, we co-expressed *SaFtsW* with its  
95 partner *SaPBP1*, and FtsW from *Pseudomonas aeruginosa* (*PaFtsW*) along with its cognate  
96 bPBP, *PaPBP3*. In both cases, the bPBP co-purified with the affinity-tagged FtsW, and the  
97 complexes possessed PGT activity (Figs. 2a, 2c and Supplementary Fig. 6). As with the  
98 individually purified components, the activity of the complexes was inactivated by substitution of  
99 the invariant aspartate in or near the presumed active site of FtsW (Figs. 2a, 2c and  
100 Supplementary Fig. 6). To assess the *in vivo* relevance of the detected FtsW polymerase  
101 activity, we compared the effect of overproducing either wild-type FtsW or inactive FtsW  
102 variants (designated FtsW\*) in their native host organism. Cell growth and division remained  
103 relatively normal upon expression of wild-type FtsW (Fig. 2 and Supplementary Figs. 7 and 8).  
104 However, production of *SaFtsW\** and *PaFtsW\** inhibited growth of both *S. aureus* and *P.*  
105 *aeruginosa*, respectively (Supplementary Fig. 7). Moreover, *SaFtsW\** caused septal  
106 abnormalities in *S. aureus*, and *PaFtsW\** expression induced cell filamentation in *P. aeruginosa*  
107 (Figs. 2b, 2d, Supplementary Figs. 8 and 9). The observed dominant-negative activity of the  
108 FtsW\* proteins in their host organism most likely results from the defective proteins saturating  
109 FtsW binding sites in the divisome complex to disrupt its function.

110 To further investigate the essentiality of FtsW polymerase activity, an FtsW depletion  
111 strain of *S. pneumoniae* was constructed. Expression of a second copy of *SpftsW* or *StftsW*  
112 rescued growth upon *SpFtsW* depletion (Fig. 2e). However, neither of the corresponding *ftsW\**  
113 alleles or *SaftsW* could prevent the lethal *SpFtsW* depletion phenotype (Fig. 2e). Taken  
114 together, the genetic and biochemical results indicate that stable FtsW-bPBP complexes are

115 formed in diverse bacteria and possess peptidoglycan polymerase activity that is required for  
116 growth and division.

117 To evaluate whether FtsW had a reciprocal stimulatory effect on bPBP activity, we used  
118 an LC-MS based assay to detect peptidoglycan crosslinks. Peptidoglycan synthesized *in vitro*  
119 was digested with mutanolysin (Fig. 3a).<sup>16,17</sup> These digestions typically produce three readily  
120 detectable muropeptide species: disaccharide (monomer) units with an attached pentapeptide  
121 (product A), monomer units with an attached tetrapeptide resulting from hydrolysis of the  
122 terminal D-alanine of the pentapeptide (product B), and two disaccharide units crosslinked by  
123 TP activity (dimer) (product C) (Fig. 3a). When *St*PBP2x was incubated with *St*FtsW and Lipid II,  
124 we observed an LC-MS peak in the mutanolysin digestions corresponding to the dimeric product  
125 (Fig. 2b and Supplementary Fig. 10). Catalytic inactivation of *St*PBP2x led to the disappearance  
126 of this peak, confirming that it resulted from TP activity of this enzyme. We observed the same  
127 dimeric species when *St*PBP2x was combined with an MGT from *S. aureus* (SgtB) or with an  
128 aPBP containing an inactivating TP mutation, *S. pneumoniae* PBP1a\*. Because *St*PBP2x can  
129 crosslink peptidoglycan strands produced by these other Lipid II polymerases, we conclude that  
130 its activity is not dependent on its cognate FtsW partner.

131 Our studies have conclusively established that FtsW from several organisms function as  
132 a peptidoglycan polymerase and that this activity requires divalent cations and complex  
133 formation with a cognate bPBP. The most likely role of the cation is to anchor the diphosphate  
134 of the Lipid II substrate and help neutralize its negative charge, but other functions are possible;  
135 structural information is needed to better understand the metal requirement. Similarly, how the  
136 bPBP partners promote FtsW polymerase activity remains to be determined. An attractive  
137 possibility is that the bPBP promotes the formation of an active conformation of FtsW in the  
138 complex. This bPBP requirement was not shared by *B. subtilis* RodA as it polymerized  
139 peptidoglycan in the absence of its cognate bPBP.<sup>2</sup> However, this activity was weak and may  
140 similarly be stimulated by complex formation.

141           Recent genetic and biochemical results from our groups also suggest that the  
142 polymerase activity of SEDS proteins requires an activation event beyond complexation with a  
143 bPBP partner *in vivo*.<sup>18</sup> Amino acid substitutions in the pedestal domain of PBP2 in *E. coli* were  
144 found to stimulate RodA activity *in vivo* and *in vitro*, and these PBP2 variants bypass the  
145 requirement for MreC and other components of the shape determining system.<sup>18</sup> Similar  
146 changes in FtsW and PBP3 from *E. coli* and *Caulobacter crescentus* were found to overcome the  
147 action of division inhibitors and thus are thought to activate the divisome.<sup>19–21</sup> It therefore  
148 appears that the synthase activity of SEDS-bPBP complexes from both the Rod system and the  
149 divisome may be controlled by similar mechanisms within their respective machineries. The  
150 development of peptidoglycan polymerase assays for both FtsW and RodA now sets the stage  
151 for the molecular details of this regulation to be uncovered.

152           Another important outstanding question relates to the division of labor between FtsW-  
153 bPBP complexes and aPBPs during septal peptidoglycan biogenesis. In *Bacillus subtilis*, cells  
154 remain viable in the absence of aPBPs, suggesting that the FtsW-bPBP complex plays a major,  
155 possibly sufficient, role in this process.<sup>22</sup> Septal peptidoglycan synthesis in *B. subtilis* is directly  
156 coupled to treadmilling of FtsZ, which colocalizes with PBP2b, the partner of FtsW.<sup>23</sup> However,  
157 most bacterial species require at least one aPBP for viability. In *S. aureus*, the essential aPBP,  
158 PBP2, is recruited to the septum and is thought to be crucial for cell division.<sup>24</sup> Contrasting with  
159 *B. subtilis*, the initial rate of septal peptidoglycan synthesis in *S. aureus* is slow and dependent  
160 on FtsZ treadmilling, but later in cytokinesis, peptidoglycan synthesis is independent of FtsZ  
161 treadmilling.<sup>25</sup> Thus, FtsW may serve as the major polymerase during treadmilling-dependent  
162 cell division, with PBP2 largely responsible for the subsequent treadmilling-independent phase  
163 of peptidoglycan synthesis.

164           Irrespective of their relative roles, both SEDS-bPBP complexes and the aPBPs are  
165 clearly critical for proper assembly of the peptidoglycan layer. Further studies of their activity

166 and regulation will therefore pave the way for the discovery of molecules that inhibit their  
167 function for future antibiotic development.

168

### 169 **Acknowledgements**

170 We thank M. Sjodt and A. Kruse for advice on protein purification. Funding for this work was  
171 provided by National Institutes of Health grants R01AI083365 (to T.G.B.), R01AI099144 (to  
172 T.G.B. and S.W.), R01GM076710 (to D.K. and S.W.) and F32GM123579 (to M.A.W.). A.T. is  
173 supported in part by the Funai Overseas Scholarship.

174

### 175 **Author Contributions**

176 A.T., T.G.B. and S.W. conceived the project. A.T., D.K., T.G.B. and S.W. designed and  
177 coordinated the overall study. Experiments were performed by A.T., M.A.W., L.S.M., and W.L.  
178 The manuscript was written by A.T., M.A.W., T.G.B. and S.W. with input from all authors.

179

### 180 **Competing Interests**

181 The authors declare no competing interest.

182

### 183 **Corresponding authors**

184 [suzanne\\_walker@hms.harvard.edu](mailto:suzanne_walker@hms.harvard.edu); [thomas\\_bernhardt@hms.harvard.edu](mailto:thomas_bernhardt@hms.harvard.edu)

185



## 186 **Methods**

187 **Materials.** Unless otherwise indicated, all chemicals and reagents were purchased from Sigma-  
188 Aldrich. Restriction enzymes were purchased from New England Biolabs. Oligonucleotide  
189 primers were purchased from Integrated DNA Technologies. Culture media were purchased  
190 from Beckton Dickinson. *S. thermophilus* LMG 18311 genomic DNA (gDNA) was purchased  
191 from ATCC (ATCC BAA-250D-5). Biotin-D-lysine (BDL) was prepared by de-protecting Fmoc-  
192 biotin-D-lysine (Bachem).<sup>17</sup> *S. aureus* Lipid II and *E. faecalis* Lipid II were isolated from cells as  
193 described previously.<sup>16,26</sup> *S. aureus* SgtB, SgtB<sup>Y181D</sup>, PBP4 and *E. faecalis* PBPX were  
194 expressed and purified as previously reported.<sup>16,17,27</sup>

195  
196 **Bacterial strains, plasmids, oligonucleotide primers and culture conditions.** *E. coli* strains  
197 were grown with shaking at 37 °C in lysogeny broth (LB), Terrific Broth (TB, Teknova), or on  
198 agarized LB plates. *S. aureus* strains were grown with shaking at 30 °C or 37 °C in Tryptic Soy  
199 Broth (TSB) or on agarized plates. *P. aeruginosa* strains were grown with shaking at 30 °C in  
200 LB, M9 broth containing 0.2% casamino acids and 0.2% glucose, or on agarized LB plates. *S.*  
201 *pneumoniae* strains were grown statically in Todd Hewitt Broth containing 0.5% yeast extract  
202 (THY) at 37 °C in an atmosphere containing 5% CO<sub>2</sub>. When growth on solid media was  
203 required, *S. pneumoniae* strains were grown on pre-poured Trypticase Soy Agar with 5% Sheep  
204 Blood (TSAII 5%SB) plates with a 5 mL overlay of 1% nutrient broth (NB) agar or TSA plates  
205 containing 5% defibrinated sheep blood with appropriate additives. The following concentration  
206 of antibiotics were used: ampicillin, 50 µg/mL; carbenicillin, 50 µg/mL; chloramphenicol, 25  
207 µg/mL, erythromycin, 0.2 µg/mL (*S. pneumoniae*) or 5 µg/mL (*S. aureus*); gentamicin, 30 µg/mL;  
208 kanamycin, 50 µg/mL (*E. coli*) or 250 µg/mL (*S. pneumoniae*); tetracycline, 0.2 µg/mL. The  
209 bacterial strains, plasmids and oligonucleotide primers used in this study are summarized in  
210 Supplementary Table 1-3. Protocols for strain and plasmid construction can be found in the  
211 Supplementary Methods.

212  
213 **Protein expression: general procedure.** For expression of *Staphylococcus* and *Streptococcus*  
214 FtsW and PBPs, *E. coli* C43(DE3) containing the expression plasmid was grown in 1 L TB  
215 supplemented with kanamycin or carbenicillin at 37 °C with shaking until OD<sub>600</sub> was 0.7-0.8. The  
216 culture was cooled to 20 °C before inducing protein expression with 500 µM isopropyl β-D-1-  
217 thiogalactopyranoside (IPTG). Cells were harvested 18 h post-induction by centrifugation (4,200  
218 x g, 15 min, 4 °C) and the pellet was stored at -80 °C.

219

220 **Purification of *Staphylococcus* and *Streptococcus* FtsW: general protocol.** For purification  
221 of FtsW, cells were resuspended in 50 mL lysis buffer A (50 mM HEPES pH 7.5, 0.5 M NaCl)  
222 supplemented with 1 tablet of cOmplete EDTA-free Protease Inhibitor Cocktail. Cells were lysed  
223 by passaging the resuspended cells through a cell disruptor (EmulsiFlex-C3, Avestin) at 15,000  
224 psi three times. Cell debris was removed by centrifugation (12,000 x g, 5 min, 4 °C) and the  
225 membrane fraction was collected by ultracentrifugation of the supernatant (100,000 x g, 1 h, 4  
226 °C). The membrane pellet was resuspended in solubilization buffer A (50 mM HEPES pH 7.5,  
227 0.5 M NaCl, 1% n-dodecyl  $\beta$ -D-maltoside (DDM), 20% glycerol) using a glass dounce tissue  
228 grinder (Wheaton). The resulting mixture was stirred for 1 h at 4 °C before ultracentrifugation  
229 (100,000 x g, 1 h, 4 °C). The resulting supernatant was supplemented with 0.5 mL pre-  
230 equilibrated Ni-NTA resin (Qiagen) and 20 mM imidazole and stirred for 30 min at 4 °C. The  
231 sample was then loaded onto a gravity column and washed with 25 mL wash buffer A (50 mM  
232 HEPES pH 7.5, 0.5 M NaCl, 0.05% DDM, 20% glycerol) containing 20 mM imidazole and 25 mL  
233 wash buffer A containing 40 mM imidazole. The protein was then eluted in 10 mL wash buffer A  
234 containing 300 mM imidazole. The eluate was further purified by size exclusion chromatography  
235 (SEC) with a Superdex 200 10/300 GL column equilibrated in running buffer A (50 mM HEPES  
236 pH 7.5, 0.5 M NaCl, 10% glycerol, 0.05% DDM). Fractions containing the target protein were  
237 concentrated by centrifugal filtration. The absorbance at 280 nm was measured using a  
238 NanoDrop One/One Microvolume UV-Vis Spectrophotometer (ThermoFisher Scientific) and the  
239 predicted extinction coefficient (ProtParam) was used to calculate concentration.<sup>28</sup> Protein  
240 samples were then aliquoted and stored at -80 °C.

241  
242 **Purification of full-length *Staphylococcus* and *Streptococcus* PBPs: general protocol.**  
243 PBPs were purified via the same protocol as FtsW, above, with the following modifications.  
244 Cells were resuspended in 50 mL lysis buffer A supplemented with 1 mM PMSF. For the  
245 solubilization buffer A and wash buffer A, 10% glycerol was used instead of 20%. For SEC, a  
246 Superose 6 10/300 GL column (GE Healthcare) was used.

247  
248 **Expression and purification of *S. thermophilus*  $\Delta$ TMPBP2x.** For expression and purification  
249 of *S. thermophilus*  $\Delta$ TMPBP2x, *E. coli* BL21(DE3) containing the expression plasmid was grown  
250 in 1 L LB supplemented with carbenicillin at 37 °C with shaking until OD<sub>600</sub> was 0.6. The culture  
251 was cooled to 16 °C before inducing protein expression with 500  $\mu$ M IPTG. Cells were  
252 harvested 18 h post-induction by centrifugation (4,200 x g, 15 min, 4 °C) and resuspended in 25  
253 mL lysis buffer A supplemented with 1 mM PMSF. Cell were lysed using a cell disruptor and the

254 supernatant was collected after ultracentrifugation (100,000 x g, 30 min, 4 °C). A pre-  
255 equilibrated 0.5 mL Ni-NTA resin and 20 mM imidazole was added and the resulting mixture  
256 was stirred for 30 min at 4 °C. The sample was loaded onto the gravity column and washed with  
257 25 mL lysis buffer A supplemented with 20 mM imidazole and 25 mL lysis buffer A  
258 supplemented with 40 mM imidazole. The protein was then eluted in 10 mL lysis buffer A  
259 containing 300 mM imidazole. The eluate was further purified by SEC with a Superdex 200  
260 10/300 GL column equilibrated in running buffer A, and the fractions containing the target  
261 protein were combined, concentrated and stored at -80 °C.

262  
263 **Co-Expression and purification of *S. aureus* FtsW-PBP1.** The FtsW-PBP1 complex was  
264 purified via the same protocol as *S. aureus* FtsW, above, with the following modifications. Lysis,  
265 solubilization, and wash buffers contained 150 mM NaCl. For the solubilization buffer A and  
266 wash buffer A, 10% glycerol was used. After the second ultracentrifugation, the resolubilized  
267 protein was applied to 500 µL washed α-FLAG G1 affinity resin (GenScript). The resin was  
268 washed with 25 mL wash buffer A containing 0.2% DDM followed by 25 mL wash buffer A  
269 containing 0.05% DDM. The protein was eluted into 10 mL wash buffer A supplemented with 0.5  
270 M NaCl, 0.05% DDM, and 0.2 mg/mL FLAG peptide.

271  
272 **Co-Expression and purification of *P. aeruginosa* FtsW-PBP3.** For expression of *P.*  
273 *aeruginosa* FtsW-PBP3, *E. coli* expression strain CAM333 containing pAM174 (encodes  
274 arabinose-inducible Ulp1 protease) and the expression plasmid was grown in 2 L TB  
275 supplemented with 2 mM MgCl<sub>2</sub>, ampicillin, and chloramphenicol at 37 °C with shaking until  
276 OD<sub>600</sub> was 0.7. The culture was cooled to 20 °C before inducing protein expression with 1 mM  
277 IPTG and 0.1% arabinose. Cells were harvested 18 h post-induction by centrifugation (4,200 x  
278 g, 15 min, 4 °C). To purify FLAG-FtsW and PBP3-His<sub>6</sub>, the cells were resuspended in lysis  
279 buffer B (50 mM HEPES pH 7.5, 150 mM NaCl, 20 mM MgCl<sub>2</sub>, 0.5 M DTT) and lysed by  
280 passage through a cell disruptor (Constant Systems) at 25,000 psi twice. Membranes were  
281 collected by ultracentrifugation (100,000 x g, 1 h, 4 °C). The membrane pellets were  
282 resuspended in solubilization buffer B (20 mM HEPES pH 7.0, 0.5 M NaCl, 20% glycerol, and  
283 1% DDM) for 1 h at 4 °C before ultracentrifugation (100,000 x g, 1 h, 4 °C). The supernatant  
284 was supplemented with 2 mM CaCl<sub>2</sub> and loaded onto a homemade M1 α-Flag antibody resin.  
285 The resin was washed with 20 column volumes (CVs) of wash buffer B (20 mM HEPES pH 7.0,  
286 0.5 M NaCl, 20% glycerol, 2 mM CaCl<sub>2</sub>, 0.1% DDM) and the bound protein was eluted from the  
287 column with five CVs of elution buffer (20 mM HEPES pH 7.0, 0.5 M NaCl, 20% glycerol, 0.1%

288 DDM, 5 mM EDTA pH 8.0, and 0.2 mg/mL 3xFLAG peptide). Fractions containing the target  
289 protein were concentrated and concentration was measured via Bradford assay. Proteins were  
290 then aliquoted and stored at -80 °C.

291

292 **Detection of PGT activity via western blot.** The protocol for detecting Lipid II/peptidoglycan  
293 was adapted from previously published methods.<sup>12,17</sup>

294 *S. thermophilus* FtsW: Unless otherwise stated, proteins (StFtsW, 0.5 μM; bPBPs, 1 μM;  
295 SgtB and SpPBP1a, 0.5 μM) were added to a 1x reaction buffer (50 mM HEPES pH 7.5, 30%  
296 DMSO, 2.5 mM MgCl<sub>2</sub>) containing BDL (2 mM) and *E. faecalis* Lipid II (10 μM) in a total volume  
297 of 10 μL. The samples were incubated at room temperature for 5 min (SgtB and SpPBP1a) or  
298 30 min (StFtsW). The reaction was heat-quenched at 95 °C for 3 min and cooled to room  
299 temperature before the addition of 1 μL *E. faecalis* PBPX (100 μM) to the reaction mixture to  
300 label Lipid II/peptidoglycan with BDL. After 30 min, 11 μL 2x Laemmli sample buffer was added  
301 to quench the labeling reaction. The samples were loaded into a 4-20% gradient polyacrylamide  
302 gel (Bio-Rad) and run at 180V. After the products were transfer to the PVDF membrane (Bio-  
303 Rad), the membrane was blocked with SuperBlock TBS blocking buffer (ThermoFisher  
304 Scientific) for 30 min. For detection of biotin-labeled products, IRDye 800CW Streptavidin (LI-  
305 COR Biosciences) was added at a final concentration of 1:5000 and the membrane was  
306 incubated for 1 h. The membrane was washed 3 x 10 min with 1 x TBS, and the blots were  
307 visualized using an Odyssey CLx imaging system (LI-COR Biosciences).

308 *S. aureus* FtsW and FtsW-PBP1\*: SaFtsW and bPBP stocks (50 μM) were combined 1:1  
309 and the mixture was chilled on ice for 30 min. The proteins (SaFtsW, 2.5 μM; bPBPs, 2.5 μM;  
310 SgtB, 1 μM) were then added to a 1x reaction buffer (50 mM HEPES pH 7.5, 30% DMSO, 10  
311 mM MgCl<sub>2</sub>) containing BDL (3 mM), moenomycin (2 μM) and *S. aureus* Lipid II (10 μM) in a total  
312 volume of 10 μL. The samples were incubated at room temperature for 5 min (SgtB) or 1 h  
313 (SaFtsW). The reaction was heat-quenched at 95 °C for 10 min. After cooling, 0.5 μL *E. faecalis*  
314 PBPX (200 μM) was added to the reaction mixture and the samples were incubated for 45 min.  
315 Reactions were quenched by the addition of 10.5 μL 2x Laemmli sample buffer. The protocol for  
316 Western blot was identical to the one used for StFtsW, described above.

317 *P. aeruginosa* FtsW-PBP3: Proteins (FtsW-PBP3, 0.5 μM; SgtB<sup>Y181D</sup>, 0.5 μM) were  
318 added to a 1x reaction buffer (125 mM HEPES pH 7.5, 20 mM MnCl<sub>2</sub>, 2.5 mM Tween 80, 200  
319 μM cephalixin, 30% DMSO) containing *E. faecalis* Lipid II (10 μM) in a total volume of 10 μL.  
320 The samples were incubated at room temperature for 30 min. Following the incubation,  
321 reactions were heat-quenched at 95°C for 2 min. After cooling, 2 μL BDL (20 mM) and 1 μL S.

322 *aureus* PBP4 (50  $\mu$ M) were added to the reaction mixture and the samples were incubated for 1  
323 h. Reactions was quenched by the addition of 13  $\mu$ L of 2x Laemmli sample buffer and samples  
324 were loaded onto a 4-20% polyacrylamide gel. The peptidoglycan product was then transferred  
325 onto PVDF membrane and the membrane was fixed by incubating in 0.4% paraformaldehyde in  
326 phosphate buffered saline (PBS) for 30 min. Subsequently, the blot was blocked using  
327 SuperBlock buffer. The biotin-labeled products were detected by incubation with IRDye 800CW  
328 Streptavidin (1:5,000 dilution). The membrane was then washed four times with TBS with 0.5%  
329 Tween-20 (TBST), followed by one wash with PBS prior to imaging.

330  
331 **LC-MS analysis of peptidoglycan crosslinking activity.** This procedure was adapted from  
332 prior reports.<sup>16,17</sup> *E. faecalis* Lipid II (20  $\mu$ M), PGT (0.5  $\mu$ M), and *S. thermophilus* PBP2x (1  $\mu$ M)  
333 were incubated in a 30  $\mu$ L 1x reaction buffer (50 mM HEPES pH 7.5, 10 mM MgCl<sub>2</sub>, 30%  
334 DMSO) at 30 °C for 1 h. The reactions were heat-quenched at 95 °C for 3 min and allowed to  
335 cool to room temperature. Polymerized material was digested by incubating the mixture at 37 °C  
336 for 3 h after the addition of 65  $\mu$ L ddH<sub>2</sub>O and 5  $\mu$ L mutanolysin (from *Streptomyces globisporus*,  
337 4000 U/mL). To reduce the muuropeptide products, 50  $\mu$ L sodium borohydride (10 mg/mL) was  
338 added and the mixture was incubated at room temperature for 30 min. The pH was adjusted to  
339 ~4 with 20% phosphoric acid and the samples were lyophilized to dryness overnight. The  
340 samples were resuspended in 20  $\mu$ L ddH<sub>2</sub>O and analyzed by LC-MS on an Agilent 6520 QTOF  
341 operating in positive ion mode. Muuropeptide products were separated on a Waters Symmetry  
342 Shield RP18 column (5  $\mu$ M, 3.9 x 150 mm) with the following method: flow rate = 0.5 mL/min,  
343 100% solvent A (H<sub>2</sub>O, 0.1% formic acid) for 5 min followed by a linear gradient of solvent B  
344 (acetonitrile, 0.1% formic acid) from 0 to 40% over 25 min. Molecular ions for the target  
345 muuropeptide fragments were extracted from the total ion chromatogram.

346  
347 **Electron microscopy of *S. aureus* cells.** Overnight cultures grown in TSB supplemented with  
348 erythromycin at 30 °C were back-diluted 1:100 in fresh TSB supplemented with or without 1 mM  
349 IPTG and grown to mid-log phase at 37 °C. Cells were then fixed by adding a mixture of 1.25%  
350 formaldehyde, 2.5% glutaraldehyde, and 0.03% picric acid in 0.1 M sodium cacodylate buffer  
351 (pH 7.4). The fixed samples were imaged by electron microscopy (JEOL 1200EX-80Kv, Harvard  
352 Medical School EM Facility) as described previously.<sup>29</sup>

353  
354 **Phase contrast microscopy of *P. aeruginosa* cells.** Overnight cultures grown in LB were  
355 back-diluted 1:500 in M9 containing 0.2% casamino acids and 0.2% glucose. These cultures



356 were then grown to an OD<sub>600</sub> of 0.2 at 30°C whereupon 1 mM of IPTG was added to induce  
357 expression. The induced cells were grown for 2.5 h. Live cells were imaged using phase  
358 contrast microscopy using a Nikon Ti inverted microscope equipped with a 100x Plan Apo 1.4  
359 Oil Ph3 DM objective, and an Andor Zyla 4.2 Plus sCMOS camera.

360  
361 **Spot dilution assay of *S. pneumoniae* strains.** Cultures were grown from glycerol stocks in  
362 THY supplemented with 0.2 mM ZnSO<sub>4</sub> and 0.02 mM MnCl<sub>2</sub> until exponential phase and  
363 normalized to an OD<sub>600</sub> of 0.1. The normalized cultures were serially diluted and 5 µL of each  
364 dilution was spotted onto TSA 5%SB plates containing 0.5% fucose or 0.2 mM ZnSO<sub>4</sub>. Plates  
365 were imaged after overnight incubation.

366

## 367 References

- 368 1. Silhavy, T. J., Kahne, D. & Walker, S. The bacterial cell envelope. *Cold Spring Harbor*  
369 *perspectives in biology* **2**, 1–17 (2010).
- 370 2. Meeske, A. J. *et al.* SEDS proteins are a widespread family of bacterial cell wall  
371 polymerases. *Nature* **537**, 634–638 (2016).
- 372 3. Cho, H. *et al.* Bacterial cell wall biogenesis is mediated by SEDS and PBP polymerase  
373 families functioning semi-autonomously. *Nat. Microbiol.* **1**, 1–8 (2016).
- 374 4. Emami, K. *et al.* RodA as the missing glycosyltransferase in *Bacillus subtilis* and antibiotic  
375 discovery for the peptidoglycan polymerase pathway. *Nat. Microbiol.* **2**, 1–8 (2017).
- 376 5. Egan, A. J. F. & Vollmer, W. The physiology of bacterial cell division. *Ann. N. Y. Acad.*  
377 *Sci.* **1277**, 8–28 (2013).
- 378 6. Otten, C., Brilli, M., Vollmer, W., Viollier, P. H. & Salje, J. Peptidoglycan in obligate  
379 intracellular bacteria. *Mol. Microbiol.* **107**, 142–163 (2017).
- 380 7. Mohammadi, T. *et al.* Identification of FtsW as a transporter of lipid-linked cell wall  
381 precursors across the membrane. *EMBO J.* **30**, 1425–1432 (2011).
- 382 8. Mohammadi, T. *et al.* Specificity of the transport of lipid II by FtsW in *Escherichia coli*. *J.*  
383 *Biol. Chem.* **289**, 14707–14718 (2014).
- 384 9. Typas, A., Banzhaf, M., Gross, C. A. & Vollmer, W. From the regulation of peptidoglycan  
385 synthesis to bacterial growth and morphology. *Nat. Rev. Microbiol.* **10**, 123–136 (2012).
- 386 10. Fay, A., Meyer, P. & Dworkin, J. Interactions between late-acting proteins required for  
387 peptidoglycan synthesis during sporulation. *J. Mol. Biol.* **399**, 547–561 (2010).
- 388 11. Fraipont, C. *et al.* The integral membrane FtsW protein and peptidoglycan synthase  
389 PBP3 form a subcomplex in *Escherichia coli*. *Microbiology* **157**, 251–259 (2011).

- 390 12. Sjodt, M. *et al.* Structure of the peptidoglycan polymerase RodA resolved by evolutionary  
391 coupling analysis. *Nature* **556**, 118–121 (2018).
- 392 13. Wissel, M. C., Wendt, J. L., Mitchell, C. J. & Weiss, D. S. The Transmembrane Helix of  
393 the Escherichia coli Division Protein FtsI Localizes to the Septal Ring. *J. Bacteriol.* **187**,  
394 320–328 (2005).
- 395 14. Piette, A. *et al.* Structural Determinants Required To Target Penicillin-Binding Protein 3 to  
396 the Septum of Escherichia coli Structural Determinants Required To Target Penicillin-  
397 Binding Protein 3 to the Septum of Escherichia coli. *J. Bacteriol.* **186**, 6110–6117 (2004).
- 398 15. Ovchinnikov, S. *et al.* Large-scale determination of previously unsolved protein structures  
399 using evolutionary information. *Elife* **4**, 1–25 (2015).
- 400 16. Welsh, M. A. *et al.* Identification of a Functionally Unique Family of Penicillin-Binding  
401 Proteins. *J. Am. Chem. Soc.* **139**, 17727–17730 (2017).
- 402 17. Qiao, Y. *et al.* Detection of lipid-linked peptidoglycan precursors by exploiting an  
403 unexpected transpeptidase reaction. *J. Am. Chem. Soc.* **136**, 14678–14681 (2014).
- 404 18. Rohs, P. D. A. *et al.* An activation pathway governs cell wall polymerization by a bacterial  
405 morphogenic machine. Submitted. (2018).
- 406 19. Du, S., Pichoff, S. & Lutkenhaus, J. FtsEX acts on FtsA to regulate divisome assembly  
407 and activity. *Proc. Natl. Acad. Sci.* **113**, E5052–E5061 (2016).
- 408 20. Modell, J. W., Hopkins, A. C. & Laub, M. T. A DNA damage checkpoint in *Caulobacter*  
409 *crescentus* inhibits cell division through a direct interaction with FtsW. *Genes Dev.* **25**,  
410 1328 (2011).
- 411 21. Modell, J. W., Kambara, T. K., Perchuk, B. S. & Laub, M. T. A DNA Damage-Induced,  
412 SOS-Independent Checkpoint Regulates Cell Division in *Caulobacter crescentus*. *PLoS*  
413 *Biol.* **12**, (2014).
- 414 22. McPherson, D. C. & Popham, D. L. Peptidoglycan Synthesis in the Absence of Class A  
415 Penicillin-Binding Proteins in *Bacillus subtilis*. *J. Bacteriol.* **185**, 1423–1431 (2003).
- 416 23. Bisson-Filho, A. W. *et al.* Treadmilling by FtsZ filaments drives peptidoglycan synthesis  
417 and bacterial cell division. *Science*. **355**, 739–743 (2017).
- 418 24. Pinho, M. G. & Errington, J. Recruitment of penicillin-binding protein PBP2 to the division  
419 site of *Staphylococcus aureus* is dependent on its transpeptidation substrates. *Mol.*  
420 *Microbiol.* **55**, 799–807 (2005).
- 421 25. Monteiro, J. M. *et al.* Peptidoglycan synthesis drives an FtsZ-treadmilling-independent  
422 step of cytokinesis. *Nature* (2018). doi:10.1038/nature25506
- 423 26. Qiao, Y. *et al.* Lipid II overproduction allows direct assay of transpeptidase inhibition by  $\beta$ -

- 424 lactams. *Nat. Chem. Biol.* **13**, 793–798 (2017).
- 425 27. Rebets, Y. *et al.* Moenomycin resistance mutations in *Staphylococcus aureus* reduce  
426 peptidoglycan chain length and cause aberrant cell division. *ACS Chem. Biol.* **9**, 459–467  
427 (2014).
- 428 28. Gasteiger, E. *et al.* ExPASy: The proteomics server for in-depth protein knowledge and  
429 analysis. *Nucleic Acids Res.* **31**, 3784–3788 (2003).
- 430 29. Lee, W. *et al.* The Mechanism of Action of Lysobactin. *J. Am. Chem. Soc.* **138**, 100–103  
431 (2016).
- 432



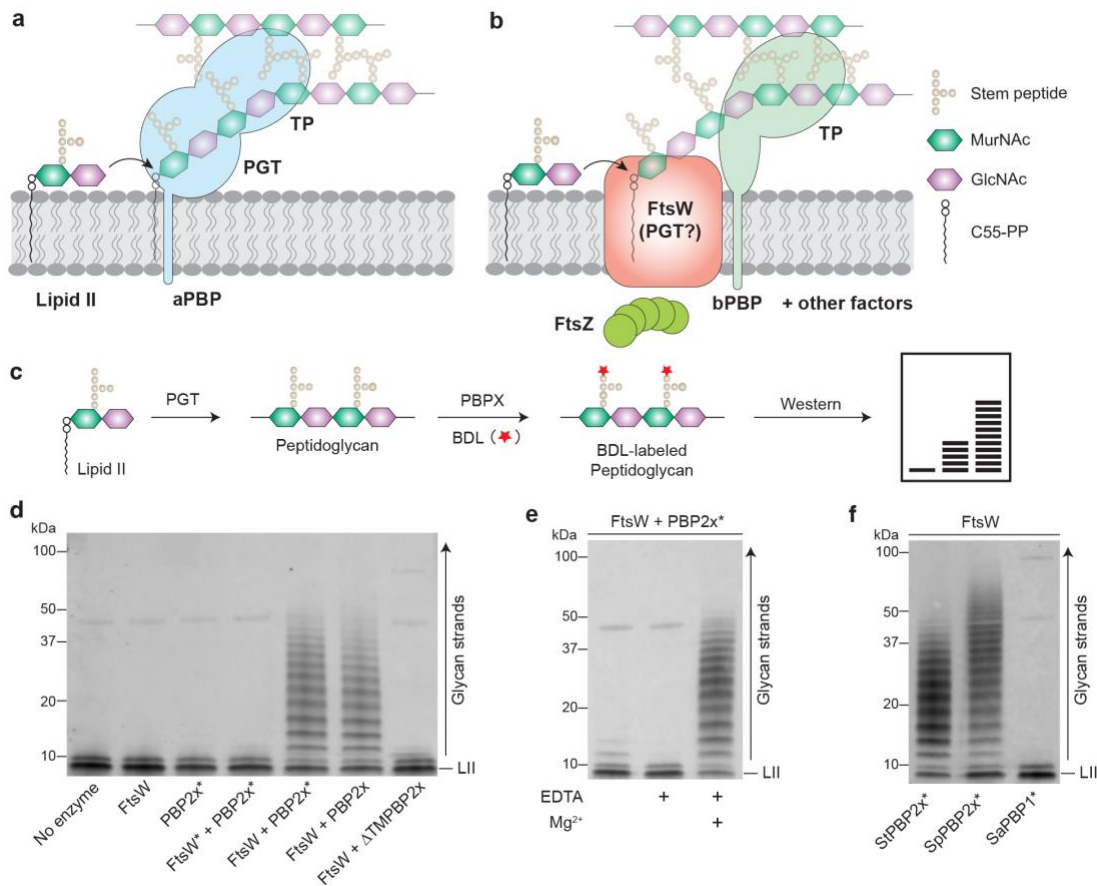

433

434 **Figure 1: FtsW is a peptidoglycan synthase**

435 **a**, Peptidoglycan synthesis by the bifunctional class A PBPs (aPBPs). **b**, Septal peptidoglycan

436 synthesis is directed by the divisome. FtsW may have peptidoglycan polymerase activity like its

437 homologue RodA from the Rod system.<sup>2</sup> **c**, Schematic of the PAGE assay used to detect

438 peptidoglycan generated *in vitro*. **d**, *S. thermophilus* FtsW polymerizes Lipid II in the presence of

439 its cognate bPBP, PBP2x. **e**, FtsW requires divalent cations for polymerase activity. **f**, *S.*

440 *thermophilus* FtsW can be activated by a near-cognate bPBP from *S. pneumoniae*. Asterisk (\*)

441 indicates the catalytically inactive variant.

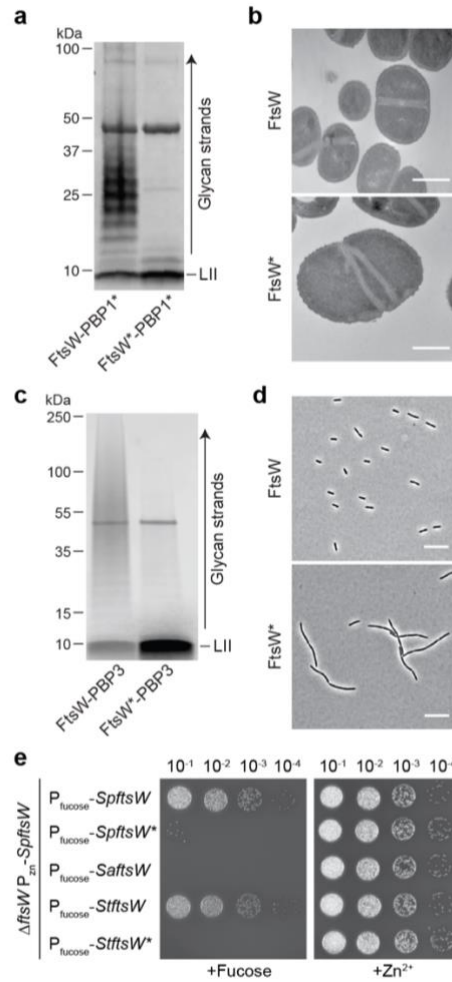

442

443 **Figure 2: The PGT activity of FtsW is essential for cell division**

444 **a**, *In vitro* polymerization of Lipid II by co-purified *S. aureus* FtsW-PBP1\* complexes. **b**, Electron  
445 microscopy images of *S. aureus* cells overexpressing the wild-type FtsW or FtsW\*. Scale bar =  
446 500 nm. **c**, *In vitro* polymerization of Lipid II by co-purified *P. aeruginosa* FtsW-PBP3  
447 complexes. **d**, Phase contrast images of *P. aeruginosa* cells overexpressing the wild-type FtsW  
448 or FtsW\*. Scale bar = 10  $\mu$ m. **e**, Depletion of FtsW in *S. pneumoniae* can be rescued by the  
449 expression of *SpftsW* or *StftsW*.

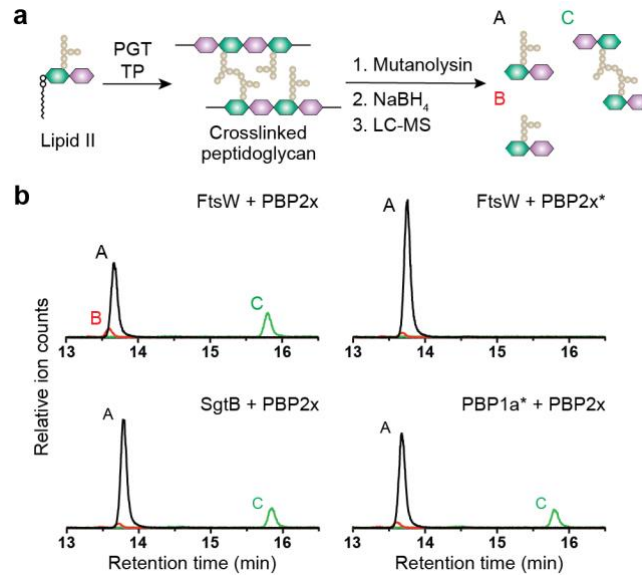

450

451 **Figure 3: *S. thermophilus* PBP2x does not require FtsW for crosslinking peptidoglycan**

452 **a**, Schematic showing detection of crosslinked muropeptide species by LC-MS. Linear  
453 peptidoglycan was generated using *S. thermophilus* FtsW, *S. aureus* SgtB or TP inactive *S.*  
454 *pneumoniae* PBP1a\* in the presence of *S. thermophilus* PBP2x. Crosslinking is detected by the  
455 appearance of peak C, a crosslinked muropeptide. **b**, LC-MS extracted ion chromatograms  
456 showing the products of crosslinking reactions with *S. thermophilus* PBP2x. Asterisk (\*) denotes  
457 the inactivated TP variant.
